# Supplementary material for: Reaction of an alkyne with dinickel-diphenylsilyl complexes. An emissive disilane formed via the consecutive Si–C and Si–Si bond-making processes
Source: Royal Society of Chemistry journal article supplement (doi:10.1039/c2cc16063c), 2012-01-01
Supplement: c2cc16063c.pdf [file c2cc16063c.pdf]

*Supplementary Information*

**Reaction of alkyne with dinickel-diphenylsilyl complexes.  
An emissive disilane formed via the consecutive Si–C and  
Si–Si bond-making processes**

Makoto Tanabe, Ryouhei Yumoto and Kohtaro Osakada,

*Chemical Resources Laboratory, Tokyo Institute of Technology,*

*4259-R1-3 Nagatsuta, Midori-ku, Yokohama 226-8503, Japan*

|                                                                                                                                        |     |
|----------------------------------------------------------------------------------------------------------------------------------------|-----|
| <b>General Procedure</b>                                                                                                               | S2  |
| <b>Table S1</b> Selected bond distances and angles of <b>1</b> , <b>2</b> and<br>$[\{M(PCy_3)\}_2(\mu\text{-HSiPh}_2)_2]$ (M = Pd, Pt) | S6  |
| <b>Table S2</b> Crystallographic data of <b>1-3</b>                                                                                    | S7  |
| <b>Figure S1.</b> $^1\text{H}$ and $^{13}\text{C}\{^1\text{H}\}$ NMR spectra of <b>1</b>                                               | S8  |
| <b>Figure S2.</b> $^1\text{H}$ NMR spectrum of <b>2</b>                                                                                | S9  |
| <b>Figure S3.</b> $^{29}\text{Si}\{^1\text{H}\}$ NMR spectra of <b>1</b> and <b>2</b>                                                  | S9  |
| <b>Figure S4.</b> $^1\text{H}$ and $^{13}\text{C}\{^1\text{H}\}$ NMR spectra of <b>3</b>                                               | S10 |

## Experimental Section

**General Procedures.** All manipulations of the complexes were carried out using standard Schlenk techniques under an argon or nitrogen atmosphere or in a nitrogen-filled glovebox (Miwa MFG). Hexane, toluene, and THF were purified by using Grubbs-type solvent purification system (Glass Contour).<sup>1</sup> Cyclohexane and ether were distilled from sodium/benzophenone and stored under nitrogen.  $^1\text{H}$ ,  $^{13}\text{C}\{^1\text{H}\}$ ,  $^{29}\text{Si}\{^1\text{H}\}$  and  $^{31}\text{P}\{^1\text{H}\}$  NMR spectra were recorded on JEOL JNM-500 MHz or Bruker Biospin Avance III 400 MHz NMR spectrometers. Chemical shifts in  $^1\text{H}$  and  $^{13}\text{C}\{^1\text{H}\}$  NMR spectra were referenced to the residual peaks of the solvents used.<sup>2</sup> The peak positions of the  $^{29}\text{Si}\{^1\text{H}\}$  and  $^{31}\text{P}\{^1\text{H}\}$  NMR spectra were referenced to external  $\text{SiMe}_4$  ( $\delta$  0) and 85%  $\text{H}_3\text{PO}_4$  ( $\delta$  0) in  $\text{C}_6\text{D}_6$  or  $\text{THF-}d_8$ , respectively. Infrared absorption spectrum (IR) was recorded on a JASCO FTIR-4100 spectrometer. Elemental analyses were performed using a LECO CHNS-932 or Yanaco MT-5 CHN autorecorder at the Center for Advanced Materials Analysis, Technical Department, Tokyo Institute of Technology. Fast atom bombardment mass spectrometry (FAB-MS) was also performed using a JEOL JMS-700 MStation at the same center. Melting points were measured using a Yanaco MP-J3 apparatus and were uncorrected.  $[\text{Ni}(\text{cod})_2]$ ,  $\text{PCy}_3$  and 1,2-bis(dimethylphosphino)ethane (dmpe) (Sigma-Aldrich),  $\text{H}_2\text{SiPh}_2$  and  $\text{PhC}\equiv\text{CPh}$  (Tokyo Chemical Industry) were purchased and used as received.

**Preparation of  $[\{\text{Ni}(\text{dmpe})\}_2(\mu\text{-SiHPh}_2)_2]$  (1).** To a toluene solution (15 mL) of  $[\text{Ni}(\text{cod})_2]$  (172 mg, 0.63 mmol) and dmpe (120  $\mu\text{L}$ , 0.72 mmol) were added  $\text{H}_2\text{SiPh}_2$  (130  $\mu\text{L}$ , 0.70 mmol). The reaction mixture was allowed to stir for 45 h at room temperature, resulting in the formation of orange slurry. The precipitate was collected by filtration, washed with hexane (5 mL  $\times$  3) and dried under vacuum to give **1** (97 mg, 40%). The crystals for X-ray crystallography were obtained by recrystallization from a THF/cyclohexane mixed solvents (1:8). Anal. calcd for  $\text{C}_{36}\text{H}_{54}\text{Ni}_2\text{P}_4\text{Si}_2$ : C, 55.13; H, 6.94; found: C, 54.55; H, 6.82.  $^1\text{H}$  NMR (400 MHz,  $\text{C}_6\text{D}_6$ , rt):  $\delta$  7.84 (d, 8H,  $\text{C}_6\text{H}_5$  *ortho*,  $J_{\text{H-H}} = 6.0$  Hz), 7.27–7.21 (m, 12H,  $\text{C}_6\text{H}_5$  *meta* and *para*), 1.23 (br, 8H,  $\text{PCH}_2$ ), 0.83–0.88 (br, 24H,  $\text{PCH}_3$ ), –4.02 (br m, 2H,  $\text{NiHSi}$ ).  $^{13}\text{C}\{^1\text{H}\}$  NMR (101 MHz,  $\text{THF-}d_8$ , rt):  $\delta$  148.7 (apparent quintet,  $\text{C}_6\text{H}_5$  *ipso*,  $^3J_{\text{P-C}} = 4.0$  Hz), 134.3 ( $\text{C}_6\text{H}_5$  *ortho*), 126.2 ( $\text{C}_6\text{H}_5$  *para*), 126.0 ( $\text{C}_6\text{H}_5$  *meta*), 32.2 (m,  $\text{PCH}_2$ ), 20.0 (br,  $\text{PCH}_3$ ), 17.0 (br,  $\text{PCH}_3$ ).  $^{29}\text{Si}\{^1\text{H}\}$  NMR (99 MHz,  $\text{THF-}d_8$ , rt):  $\delta$  113.6 (apparent quintet,

$^2J_{\text{P-Si}} = 20$  Hz).  $^{31}\text{P}\{^1\text{H}\}$  NMR (162 MHz,  $\text{C}_6\text{D}_6$ , rt):  $\delta$  8.31. IR (KBr)  $\nu_{\text{max}}/\text{cm}^{-1}$ : 1579br (Si-H). FAB-HRMS calcd for  $\text{C}_{36}\text{H}_{54}\text{Ni}_2\text{P}_4\text{Si}_2$ : 782.1422 [ $\text{M}^+$ ]; found: 782.1440.

**Preparation of  $[\{\text{Ni}(\text{PCy}_3)\}_2(\mu\text{-SiHPh}_2)_2]$  (**2**).** To a hexane solution (30 mL) of  $[\text{Ni}(\text{cod})_2]$  (1.74 g, 6.33 mmol) and  $\text{PCy}_3$  (2.53 g, 9.02 mmol) was added  $\text{H}_2\text{SiPh}_2$  (1.60 mL, 8.62 mmol). The reaction mixture was stirred at room temperature for 20 h, causing an orange precipitate from the red solution. The precipitate was collected by filtration, washed with hexane ( $20\text{ mL} \times 2$ ) and dried under vacuum to give **2** (3.20 g, 97%) as an orange solid. The crystals suitable for X-ray crystallography were obtained by recrystallization from a THF/ether mixed solvent (1:8). Anal. calcd for  $\text{C}_{60}\text{H}_{88}\text{Ni}_2\text{P}_2\text{Si}_2$ : C, 68.97; H, 8.49; found: C, 66.86; H, 8.68.  $^1\text{H}$  NMR (400 MHz,  $\text{C}_6\text{D}_6$ , rt):  $\delta$  8.11 (d, 8H,  $\text{C}_6\text{H}_5$  *ortho*,  $J_{\text{H-H}} = 7.4$  Hz), 7.34 (t, 8H,  $\text{C}_6\text{H}_5$  *meta*,  $J_{\text{H-H}} = 7.4$  Hz), 7.22 (t, 4H,  $\text{C}_6\text{H}_5$  *para*,  $J_{\text{H-H}} = 7.4$  Hz), 1.86–1.76 (m, 18H,  $\text{PC}_6\text{H}_{11}$ ), 1.51 (br, 18H,  $\text{PC}_6\text{H}_{11}$ ), 1.30 (m, 12H,  $\text{PC}_6\text{H}_{11}$ ), 0.99 (m, 18H,  $\text{PC}_6\text{H}_{11}$ ),  $-2.04$  (m,  $\text{NiHSi}$ ,  $J_{\text{P-H}} = 15$  Hz).  $^{13}\text{C}\{^1\text{H}\}$  NMR (126 MHz,  $\text{C}_6\text{D}_6$ , rt):  $\delta$  144.7 ( $\text{C}_6\text{H}_5$  *ipso*), 136.8 ( $\text{C}_6\text{H}_5$  *ortho*), 128.3 ( $\text{C}_6\text{H}_5$  *meta*), 127.6 ( $\text{C}_6\text{H}_5$  *para*), 36.8 (apparent triplet, PCH,  $|J_{\text{P-C}} + ^4J_{\text{P-C}}| = 8.3$  Hz), 30.7 (PCHCH<sub>2</sub>), 27.8 (apparent triplet, PCHCH<sub>2</sub>CH<sub>2</sub>,  $J = 5.1$  Hz), 26.6 (PCHCH<sub>2</sub>CH<sub>2</sub>CH<sub>2</sub>).  $^{29}\text{Si}\{^1\text{H}\}$  NMR (99 MHz,  $\text{C}_6\text{D}_6$ , rt):  $\delta$  121.8 (m,  $^2J_{\text{P-Si}} = 25$  Hz).  $^{31}\text{P}\{^1\text{H}\}$  NMR (162 MHz,  $\text{C}_6\text{D}_6$ , rt):  $\delta$  45.9. IR (KBr)  $\nu_{\text{max}}/\text{cm}^{-1}$ : 1590br (Si-H).

**Conversion of **2** into **1** by addition of dmpe.** To a toluene solution (20 mL) of **2** (1.21 g, 1.16 mmol) was added dmpe (390  $\mu\text{L}$ , 2.34 mmol) and then the mixture was stirred at room temperature for 16 h. The solution was evaporated under reduced pressure to give an orange residue, which was washed with hexane ( $9\text{ mL} \times 3$ ) and dried under vacuum to give **1** (815 mg, 90%) as a red solid.

**Reaction of **1** with  $\text{PhC}\equiv\text{CPh}$ .** To a mixture of complex **1** (204 mg, 0.26 mmol) and  $\text{PhC}\equiv\text{CPh}$  (196 mg, 1.10 mmol) was added 5 mL of toluene, followed by stirring at  $60^\circ\text{C}$  for 22 h. The reaction solution was diluted in  $\text{CH}_2\text{Cl}_2$  (20 mL) and filtered through Florisil to remove decomposition products. The solvent was evaporated under reduced pressure to give a yellow oil. The crude product was purified by a column chromatography on silica gel (eluent:  $\text{CH}_2\text{Cl}_2/\text{hexane} = 1:10$ ,  $R_f = 0.18$ ), followed by recrystallization from toluene/hexane (1:7) to give 1,2-bis $\{(E)\text{-1,2-diphenylethenyl}\}$ -1,1,2,2-tetraphenyldisilane (**3**: 80 mg, 43%) as colorless crystals. The NMR spectroscopic data of the reaction mixture before purification displayed almost complete

conversion into **3** and  $[\text{Ni}(\eta^2\text{-PhC}\equiv\text{CPh})(\text{dmpe})]_3$  (**4**). To isolate the Ni complex from the mixture, the solvent was removed under reduced pressure. The crude product was washed with hexane (2 mL  $\times$  2) and recrystallized repeatedly with toluene/hexane (10:3) to give **4** as pale yellow solid (2.9 mg, 6%). Data for **3**. Anal. calcd for  $\text{C}_{52}\text{H}_{42}\text{Si}_2$ : C, 86.38; H, 5.85; found: C, 86.34; H, 5.79.  $^1\text{H}$  NMR (400 MHz,  $\text{THF-}d_8$ , rt):  $\delta$  7.44 (d, 8H,  $\text{SiC}_6\text{H}_5$  *ortho*,  $J_{\text{H-H}} = 7.0$  Hz), 7.29 (t, 4H,  $\text{SiC}_6\text{H}_5$  *para*,  $J_{\text{H-H}} = 7.1$  Hz), 7.17 (t, 10H,  $\text{C}_6\text{H}_5$  *meta* and  $=\text{CH}$ ,  $J_{\text{H-H}} = 6.9$  Hz), 7.01 (m, 6H,  $=\text{CC}_6\text{H}_5$  *para* and *meta*), 6.91 (br, 6H,  $=\text{CC}_6\text{H}_5$  *para* and *meta*), 6.78 (m, 8H,  $=\text{CC}_6\text{H}_5$  *ortho*).  $^{13}\text{C}\{^1\text{H}\}$  NMR (101 MHz,  $\text{THF-}d_8$ , rt):  $\delta$  145.2 ( $=\text{CH}$ ), 142.5 ( $=\text{CC}_6\text{H}_5$  *ipso*), 142.0 ( $=\text{CSi}$ ), 138.0 ( $=\text{CC}_6\text{H}_5$  *ipso*), 137.5 ( $\text{SiC}_6\text{H}_5$  *ortho*), 135.6 ( $\text{SiC}_6\text{H}_5$  *ipso*), 130.2 ( $\text{SiC}_6\text{H}_5$  *para*), 129.7 ( $=\text{CC}_6\text{H}_5$  *ortho*), 129.1 ( $=\text{CC}_6\text{H}_5$  *meta*), 128.7 ( $=\text{CC}_6\text{H}_5$  *ortho*), 128.4 ( $=\text{CC}_6\text{H}_5$  *meta*), 128.2 ( $\text{SiC}_6\text{H}_5$  *meta*), 127.9 ( $=\text{CC}_6\text{H}_5$  *para*), 126.3 ( $=\text{CC}_6\text{H}_5$  *para*).  $^{29}\text{Si}\{^1\text{H}\}$  NMR (99 MHz,  $\text{C}_6\text{D}_6$ , rt):  $\delta$  -20.3. mp 171–173 °C. Data for **4**:  $^1\text{H}$  NMR (400 MHz,  $\text{THF-}d_8$ , rt):  $\delta$  7.48 (d, 4H,  $\text{C}_6\text{H}_5$  *ortho*,  $J_{\text{H-H}} = 6.8$  Hz), 7.21 (t, 4H,  $\text{C}_6\text{H}_5$  *meta*,  $J_{\text{H-H}} = 7.6$  Hz), 7.04 (t, 2H,  $\text{C}_6\text{H}_5$  *para*,  $J_{\text{H-H}} = 7.4$  Hz), 1.64 (m, 4H,  $\text{PCH}_2$ ,  $J_{\text{P-H}} = 13$  Hz), 1.42 (apparent triplet, 12H,  $\text{PCH}_3$ ,  $J_{\text{P-H}} = 3.2$  Hz).  $^{13}\text{C}\{^1\text{H}\}$  NMR (101 MHz,  $\text{THF-}d_8$ , rt):  $\delta$  138.2 (apparent triplet,  $\text{C}_6\text{H}_5$  *ipso*,  $^3J_{\text{P-C}} = 8.9$  Hz), 137.6 (d,  $\equiv\text{CC}_6\text{H}_5$ ,  $^2J_{\text{P-C}} = 13$  Hz), 129.3 ( $\text{C}_6\text{H}_5$  *ortho*), 128.3 ( $\text{C}_6\text{H}_5$  *meta*), 125.2 ( $\text{C}_6\text{H}_5$  *para*), 30.3 (apparent triplet,  $\text{PCH}_2$ ,  $|J_{\text{P-C}} + ^2J_{\text{P-C}}| = 22$  Hz), 15.6 (apparent triplet,  $\text{PCH}_3$ ,  $|J_{\text{P-C}} + ^3J_{\text{P-C}}| = 11$  Hz).  $^{31}\text{P}\{^1\text{H}\}$  NMR (162 MHz,  $\text{THF-}d_8$ , rt):  $\delta$  22.5.

**Cyclotrimerization of  $\text{PhC}\equiv\text{CPh}$  catalyzed by **2**.** To a toluene solution (5 mL) of  $\text{PhC}\equiv\text{CPh}$  (56.3 mg, 0.32 mmol) was added catalytic amount of **2** (16.5 mg, 16  $\mu\text{mol}$ ). The reaction mixture was then stirred at 60 °C for 16 h. The reaction solution was diluted in  $\text{CH}_2\text{Cl}_2$  (20 mL) and filtered through Florisil to remove decomposition products. The solvent was removed under vacuum to give pure hexaphenylbenzene (54.2 mg, 96 %). The  $^1\text{H}$  NMR data of the product is consistent with that of the literature.<sup>4</sup> A similar reaction of  $\text{PhC}\equiv\text{CPh}$  (5.1 mg, 29  $\mu\text{mol}$ ) with **2** (7.5 mg, 7.2  $\mu\text{mol}$ ) in 4:1 ratio in  $\text{C}_6\text{D}_6$  (0.6 mL) was performed at 60 °C for 9 h in an NMR sample tube. The  $^1\text{H}$  NMR analysis of the reaction solution revealed the quantitative conversion of  $\text{PhC}\equiv\text{CPh}$  into hexaphenylbenzene.

**Crystallographic data.** Single crystals of **1**, **2** and **3** suitable for X-ray diffraction study were mounted on MicroMounts (MiTeGen). The crystallographic data of **1**, **2** and **3** were collected on a Rigaku Saturn CCD area detector equipped with monochromated Mo  $\text{K}\alpha$  radiation ( $\lambda = 0.71073$  Å) at

113 K. Calculations were carried out using the program package Crystal Structure, version 4.0, for Windows. The positional and thermal parameters of non-hydrogen atoms were refined anisotropically on  $F_2$  by the full-matrix least-squares method using SHELXL-97.<sup>5</sup> Hydrogen atoms, except for the bridging SiH hydrogens of **1** and **2**, were placed at calculated positions and refined with a riding mode on their corresponding carbon atoms. The bridging SiH hydrogens (H1) of **1** were found from the Fourier-difference electron-density and refined isotropically. Results of **1** contained severe disorder of the solvent molecule. Although the solvent molecule was calculated as cyclohexane, it would be also possible to involve THF or C<sub>6</sub>D<sub>6</sub> molecules as the crystal solvent. The efforts to improve it were not successful. The bridging SiH hydrogens (H1) of **2** were found from the Fourier-difference electron-density and fixed. Results of complex **2** contained large range of  $U_{eq}$  values for hydrogens (Alert B by checkcif). High  $R_{int}$  and  $wR_2$  values of **3** are attributed to the small number of diffraction due to poor quality of the crystals. Selected Bond Distances (Å) and Angles (deg) of **1**, **2** and [ $\{M(PCy_3)\}_2(\mu-HSiPh_2)_2$ ] ( $M = Pd$ ,<sup>6</sup>  $Pt$ <sup>7</sup>) are listed in Table S1. Crystallographic data and details of refinement of **1**, **2** and **3** are summarized in Table S2.

## References

- 1) A. B. Pangborn, M. A. Giardello, R. H. Grubbs, R. K. Rosen and F. J. Timmers, *Organometallics*, 1996, **15**, 1518.
- 2) G. R. Fulmer, A. J. M. Miller, N. H. Sherden, H. E. Gottlieb, A. Nudelman, B. M. Stoltz, J. E. Bercaw and K. I. Goldberg, *Organometallics*, 2010, **29**, 2176.
- 3) K. R. Pörschke, R. Mynott, K. Angermund and C. Krüger, *Z. Naturforsch*, 1985, **40b**, 199.
- 4) C. Müller, R. J. Lachicotte and W. D. Jones, *Organometallics*, 2002, **21**, 1975.
- 5) G. M. Sheldrick, *SHELXL-97: Program for the Crystal Structures*; University of Gottingen: Gottingen, Germany, 1997.
- 6) M. Tanabe, T. Yamada and K. Osakada, *Organometallics*, 2003, **22**, 2190.
- 7) M. Tanabe, D. Ito and K. Osakada, *Organometallics*, 2008, **27**, 2258.

**Table S1.** Selected Bond Distances (Å) and Angles (deg) of **1**, **2** and

[{M(PCy<sub>3</sub>)}<sub>2</sub>(μ-HSiPh<sub>2</sub>)<sub>2</sub>] (M = Pd, Pt)

|          | <b>1</b>  | <b>2</b>  | [{Pd(PCy <sub>3</sub> )} <sub>2</sub> (μ-HSiPh <sub>2</sub> ) <sub>2</sub> ] | [{Pt(PCy <sub>3</sub> )} <sub>2</sub> (μ-HSiPh <sub>2</sub> ) <sub>2</sub> ] |
|----------|-----------|-----------|------------------------------------------------------------------------------|------------------------------------------------------------------------------|
| M–M      | 2.6417(5) | 2.495(1)  | 2.691(1)                                                                     | 2.6985(3)                                                                    |
| M–Si     | 2.2175(8) | 2.215(2)  | 2.326(2)                                                                     | 2.326(2)                                                                     |
| M–Si*    | 2.2402(8) | 2.249(2)  | 2.384(2)                                                                     | 2.385(2)                                                                     |
| M–P      | 2.1751(7) | 2.173(2)  | 2.316(2)                                                                     | 2.268(2)                                                                     |
|          | 2.2414(9) |           |                                                                              |                                                                              |
| M–H      | 1.56(3)   | 1.415(1)  | 1.61                                                                         | 1.94(8)                                                                      |
| Si*–H    | 1.69(2)   | 1.616(2)  | 1.63                                                                         | 1.88(7)                                                                      |
| Si–M–Si* | 107.32(3) | 112.04(7) | 110.32(7)                                                                    | 110.13(7)                                                                    |
| M–Si–M*  | 72.68(3)  | 67.96(6)  | 69.68(7)                                                                     | 69.87(5)                                                                     |

**Table S2.** Crystallographic Data and Details of Refinement of **1**, **2** and **3**

|                                                               | <b>1</b> ·C <sub>6</sub> H <sub>12</sub>                                       | <b>2</b>                                                                       | <b>3</b>                                        |
|---------------------------------------------------------------|--------------------------------------------------------------------------------|--------------------------------------------------------------------------------|-------------------------------------------------|
| formula                                                       | C <sub>42</sub> H <sub>66</sub> Ni <sub>2</sub> P <sub>4</sub> Si <sub>2</sub> | C <sub>60</sub> H <sub>88</sub> Ni <sub>2</sub> P <sub>2</sub> Si <sub>2</sub> | C <sub>52</sub> H <sub>42</sub> Si <sub>2</sub> |
| fw                                                            | 868.45                                                                         | 1044.87                                                                        | 723.07                                          |
| cryst size/mm                                                 | 0.11×0.15×0.21                                                                 | 0.15×0.20×0.20                                                                 | 0.25×0.28×0.32                                  |
| cryst syst                                                    | monoclinic                                                                     | monoclinic                                                                     | monoclinic                                      |
| cryst color                                                   | red                                                                            | red                                                                            | yellow                                          |
| space group                                                   | <i>P</i> 2 <sub>1</sub> /n ( <i>No.</i> 14)                                    | <i>P</i> 2 <sub>1</sub> /c ( <i>No.</i> 14)                                    | <i>P</i> 2 <sub>1</sub> /c ( <i>No.</i> 14)     |
| <i>a</i> /Å                                                   | 12.421(2)                                                                      | 10.228(2)                                                                      | 21.774(9)                                       |
| <i>b</i> /Å                                                   | 13.104(3)                                                                      | 13.576(3)                                                                      | 9.170(3)                                        |
| <i>c</i> /Å                                                   | 14.176(3)                                                                      | 20.026(4)                                                                      | 22.267(8)                                       |
| <i>β</i> /deg                                                 | 111.783(2)                                                                     | 91.961(3)                                                                      | 113.51(1)                                       |
| <i>V</i> /Å <sup>3</sup>                                      | 2142.6(7)                                                                      | 2779.2(9)                                                                      | 4077(3)                                         |
| <i>Z</i>                                                      | 2                                                                              | 2                                                                              | 4                                               |
| <i>D</i> <sub>calcd</sub> /g cm <sup>-3</sup>                 | 1.346                                                                          | 1.249                                                                          | 1.178                                           |
| <i>F</i> (000)                                                | 924                                                                            | 1124                                                                           | 1528                                            |
| <i>μ</i> /mm <sup>-1</sup>                                    | 1.1131                                                                         | 8.150                                                                          | 0.1219                                          |
| 2 $\theta$ range, deg                                         |                                                                                |                                                                                |                                                 |
| no. of reflns meads                                           | 17196                                                                          | 22419                                                                          | 28141                                           |
| no. of unique reflns                                          | 4905                                                                           | 6363                                                                           | 8990                                            |
| <i>R</i> <sub>int</sub>                                       | 0.0541                                                                         | 0.1036                                                                         | 0.2416                                          |
| no. of obsd reflns<br>( <i>I</i> > 2 $\sigma$ ( <i>I</i> ))   | 3288                                                                           | 3470                                                                           | 2845                                            |
| no. of variables                                              | 230                                                                            | 302                                                                            | 487                                             |
| <i>R</i> 1, <i>wR</i> 2 ( <i>I</i> > 2 $\sigma$ ( <i>I</i> )) | 0.0333, 0.0455                                                                 | 0.0614, 0.1333                                                                 | 0.1204, 0.2638                                  |
| <i>R</i> 1, <i>wR</i> 2 ( <i>all data</i> )                   | 0.0455, 0.0936                                                                 | 0.1376, 0.2409                                                                 | 0.2451, 0.3489                                  |
| GOF on <i>F</i> <sup>2</sup>                                  | 0.949                                                                          | 0.992                                                                          | 0.950                                           |

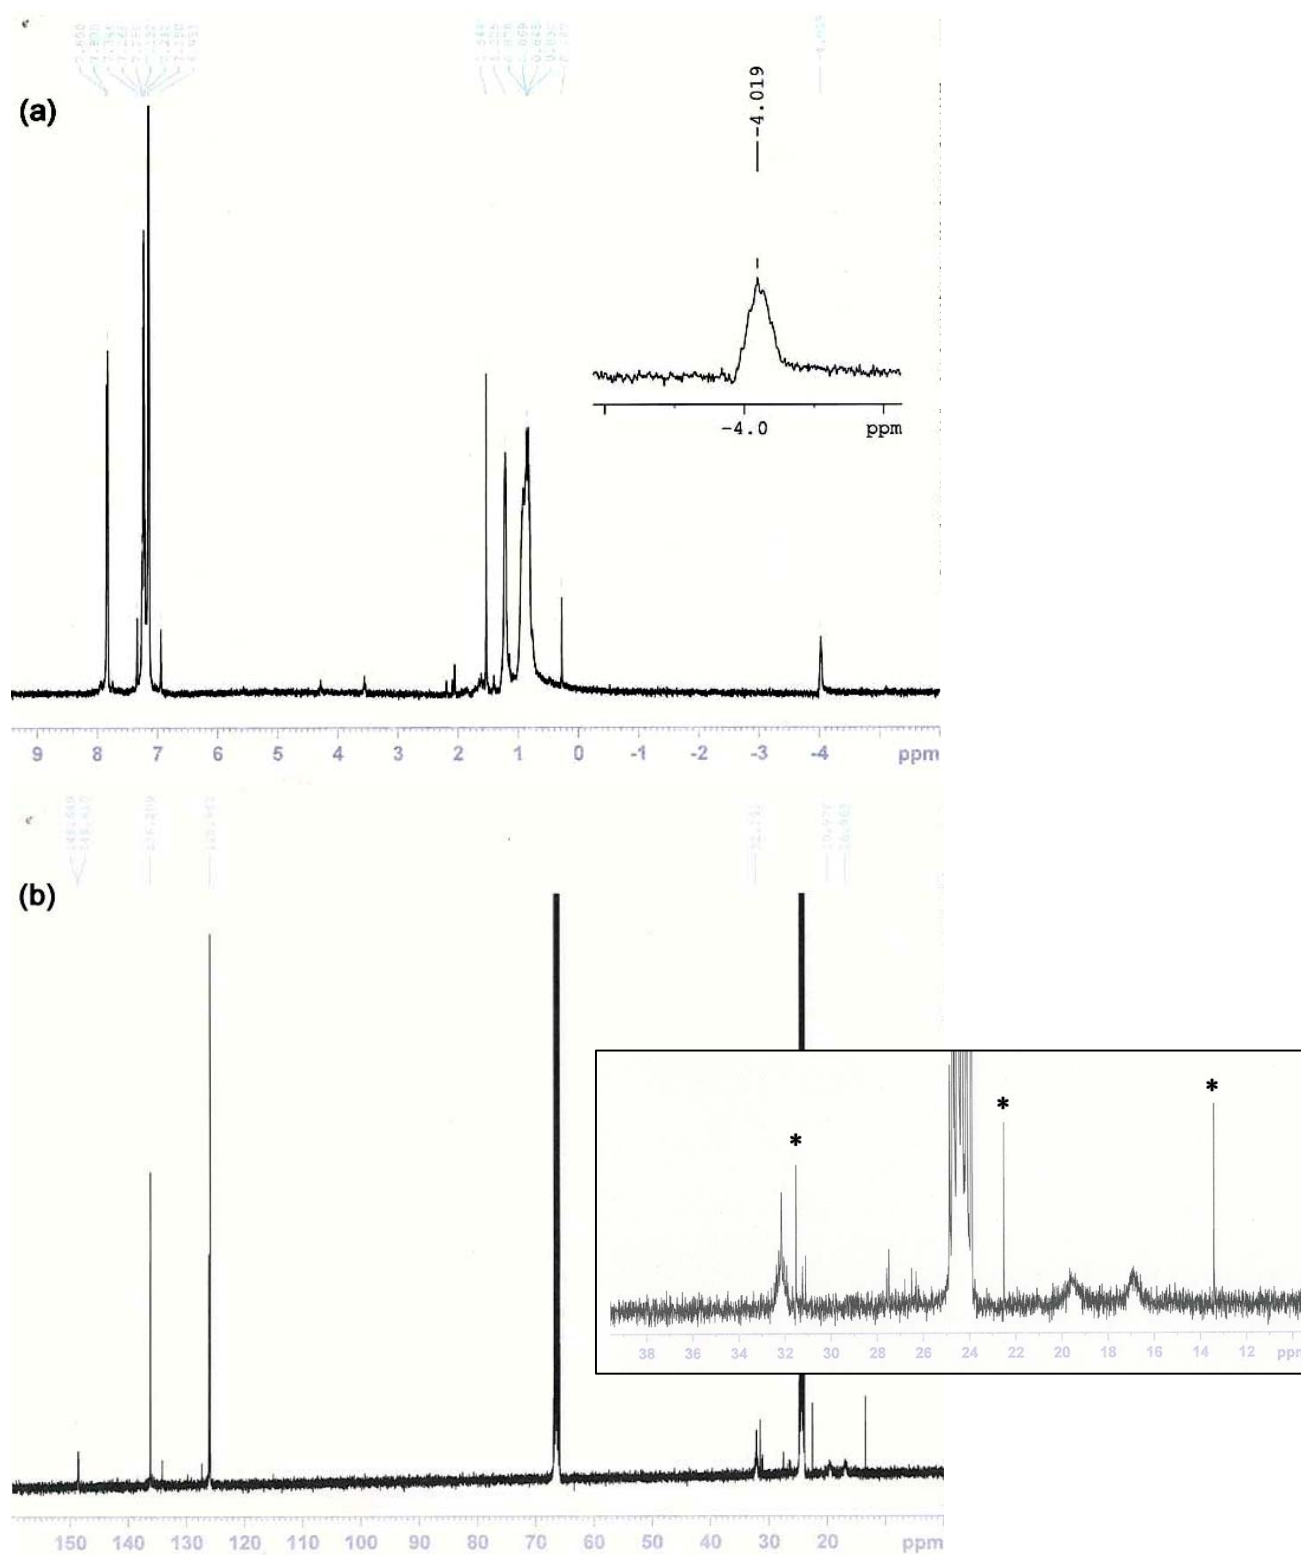

Figure S1. (a)  $^1\text{H}$  NMR spectrum of **1** in  $\text{C}_6\text{D}_6$  and (b)  $^{13}\text{C}\{^1\text{H}\}$  NMR spectrum of **1** in  $\text{THF-}d_8$ . (\* = hexane)

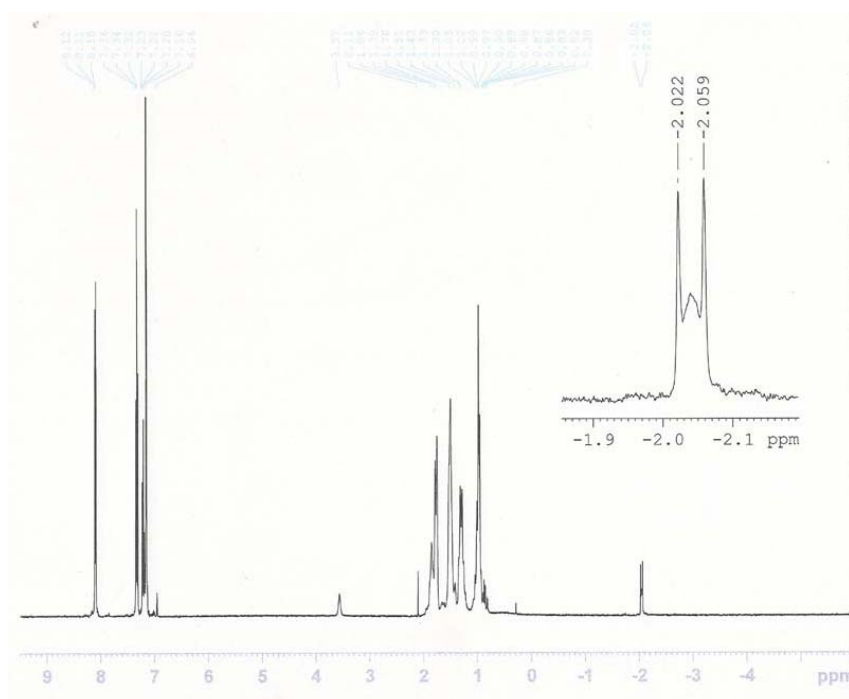

Figure S2.  $^1\text{H}$  NMR spectrum of **2** in  $\text{C}_6\text{D}_6$ .

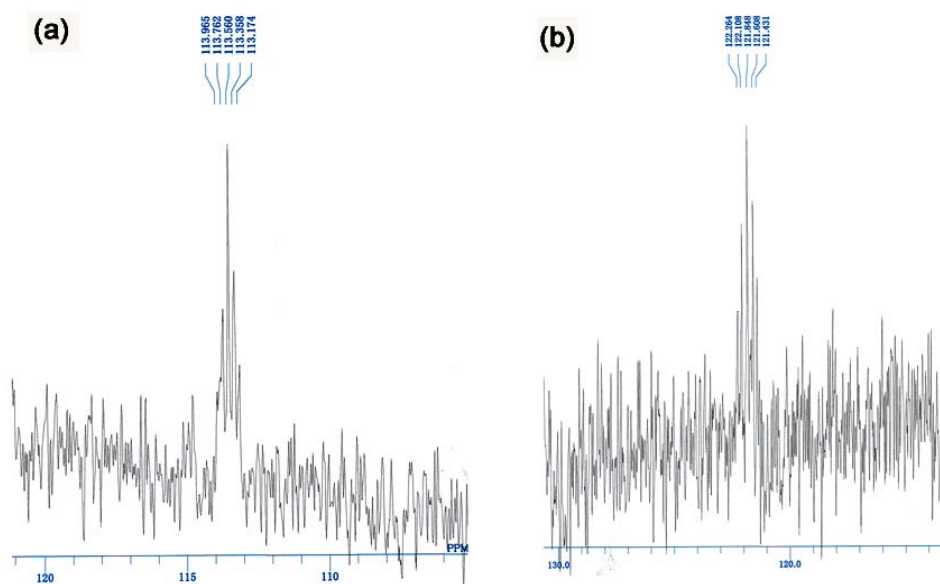

Figure S3.  $^{29}\text{Si}\{^1\text{H}\}$  NMR spectra of (a) **1** in  $\text{THF-}d_8$  and (b) **2** in  $\text{C}_6\text{D}_6$ .

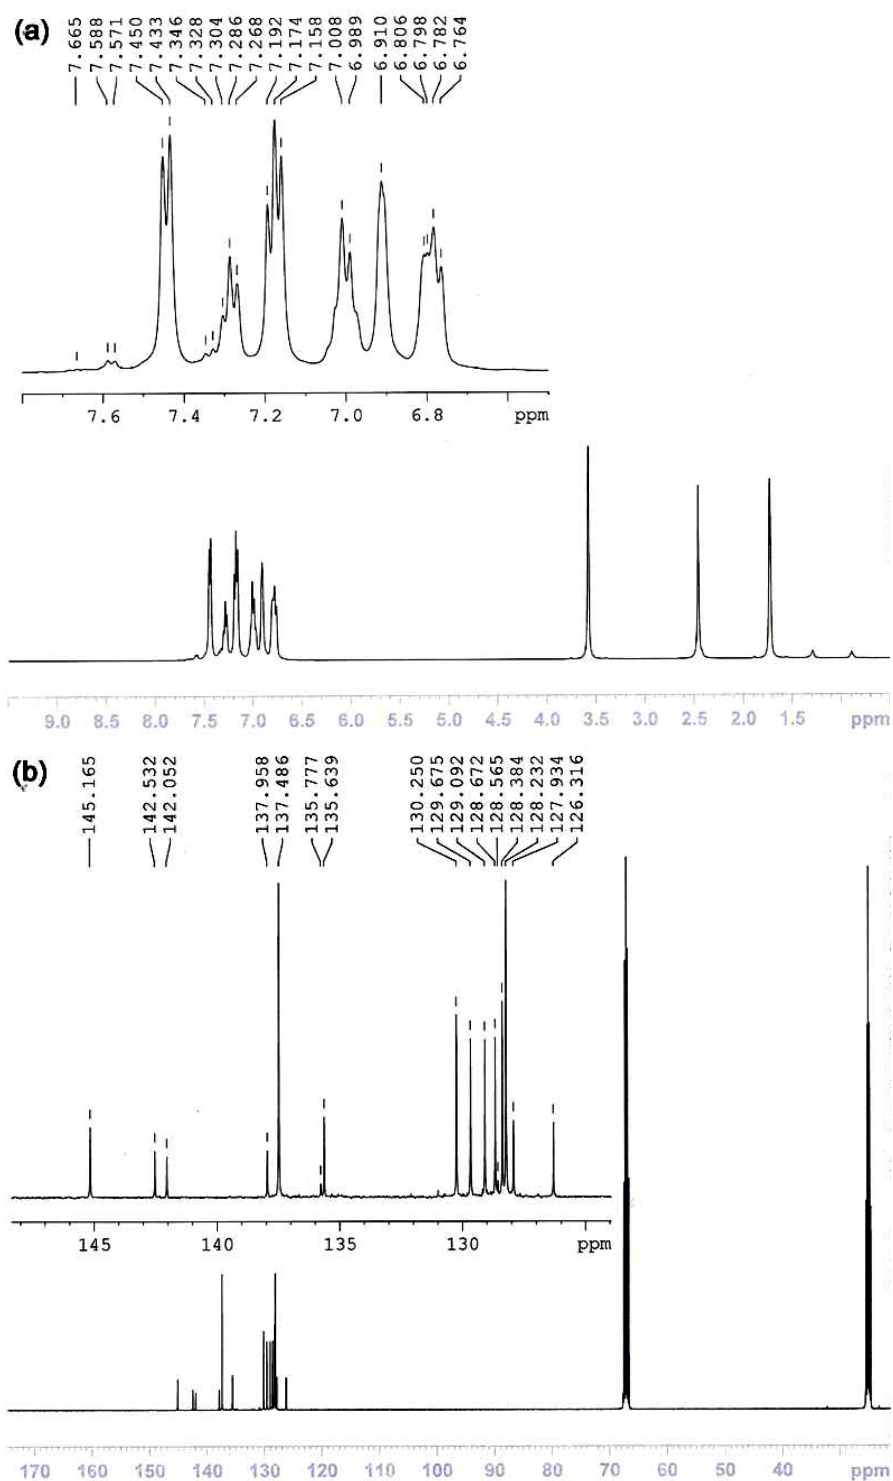

Figure S4. (a)  $^1\text{H}$  and (b)  $^{13}\text{C}\{^1\text{H}\}$  NMR spectra of **3** in  $\text{THF-}d_8$ .
